# Supplementary material
Source: PubMed Central journal article supplement (PMC3877684)
Supplement: NIHMS533836-supplement-01.pdf [file NIHMS533836-supplement-01.pdf]

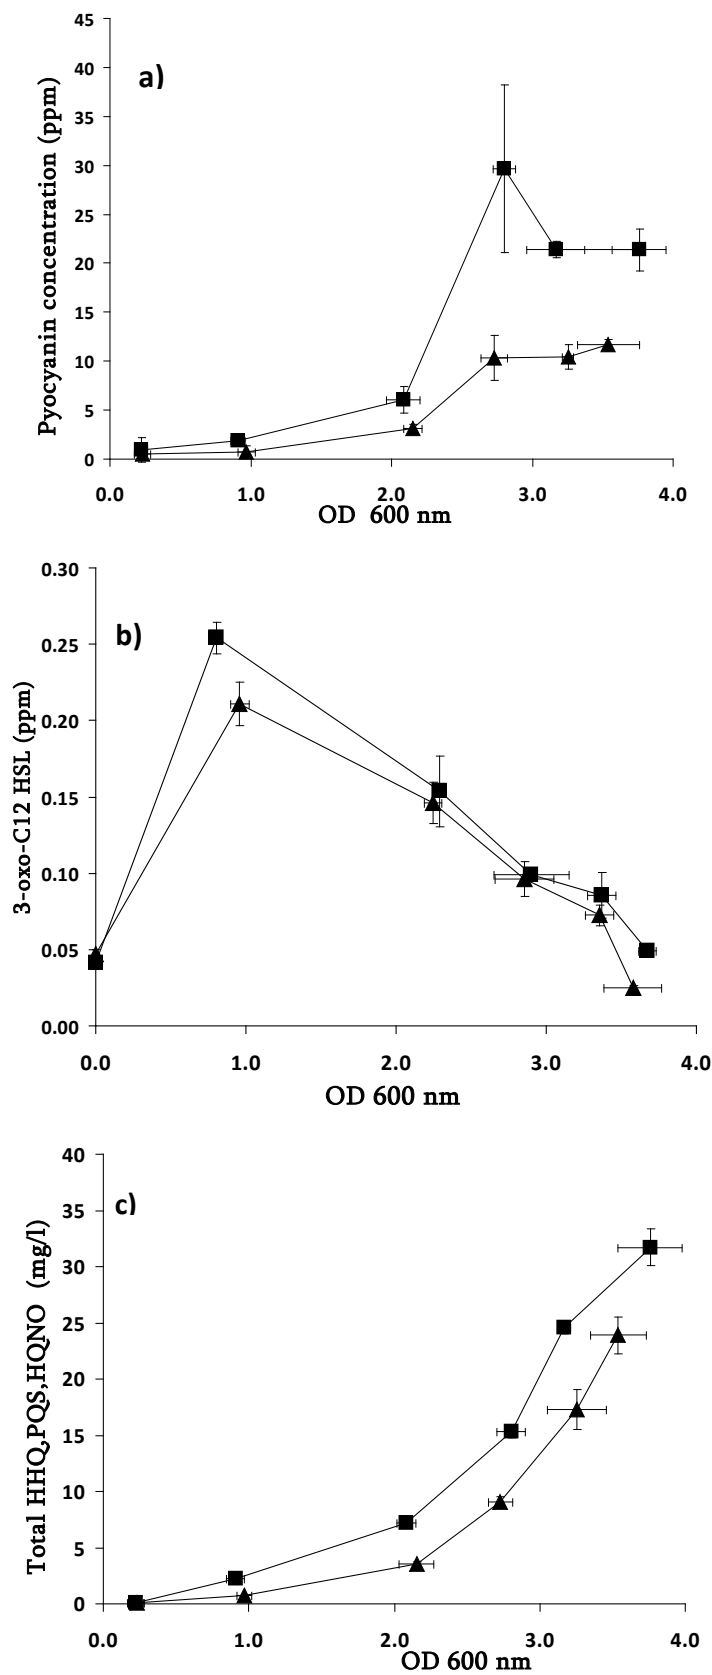

**Supplemental Figure S1 (related to Figure 2): Effect of dodecanoic acid addition on production of various *Pseudomonas aeruginosa* secondary metabolites.** Production of (a) pyocyanin, (b) 3-oxo-C<sub>12</sub>-HSL and (c) the sum of PQS, HHQ and HQNO in a *P. aeruginosa* PA14 control culture in TSB (▲) and upon supplementation with 1 mM dodecanoic acid (■). Data are represented as mean +/- SD.

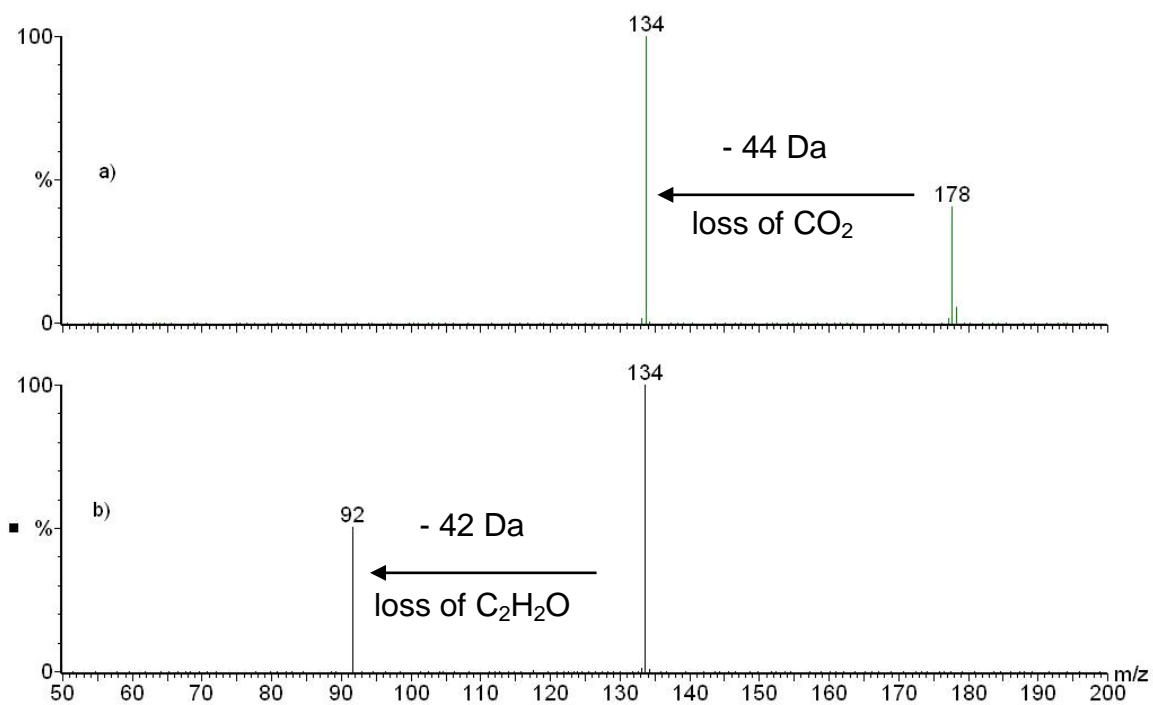

**Supplemental Figure S2 (related to Figure 3): Negative electrospray MS/MS spectrum of 2-ABA purified from *P. aeruginosa* culture supernatant. Collision energy of (a) 5 eV and (b) 15 eV.**

**Supplemental Table S1. PCR primers.**

Used for the construction of various new expression plasmids listed in Table 1.

| Name                 | Sequence<br><i>(sequence that hybridizes with DNA template is highlighted)</i> |
|----------------------|--------------------------------------------------------------------------------|
| F-PqsC-NdeI          | 5' ACACACCATCATATGCATAAGGTCAAAGTGGC 3'                                         |
| R-PqsC-EcoRI         | 5' ACACACCATGAATTCAGCAACAGGTCGATGTCCTC 3'                                      |
| F-PqsB-XbaI          | 5' GACTTCTAGAATGTTGATTCAGGCTGTGGG 3'                                           |
| R-PqsBHisTag-SacI    | 5' GAGCTCTTTGTTAGCAGCCGGATCTC 3'                                               |
| F-PqsB-NdeI          | 5' ACACACACACATATGTTGATTCAGGCTGTGGG 3'                                         |
| R-PqsB-HindIII       | 5' ACACACACAAAGCTTCTATTATGCATGAGCTTCTCCCG 3'                                   |
| PqsC_C129A           | 5' GATTCGCAGATGGAGGCCGCCAGCTTCCTGCT 3'                                         |
| PqsC_C129A-Antisense | 5' AGCAGGAAGCTGGCGGCCTCCATCTGCGAATC 3'                                         |
